# 1 CRISPRi is not strand-specific and redefines the transcriptional 2 landscape

3  
4 Françoise S. Howe<sup>1</sup>, Andrew Russell<sup>1</sup>, Afaf El-Sagheer<sup>2,3</sup>, Anitha Nair<sup>1</sup>, Tom Brown<sup>2</sup> and Jane Mellor<sup>1\*</sup>.

5 <sup>1</sup> Department of Biochemistry, University of Oxford, South Parks Road, Oxford, OX1 3QU, UK

6 <sup>2</sup>Department of Chemistry, Chemistry Research Laboratory, University of Oxford, South Parks Road,  
7 Oxford, OX1 3TA, UK

8 <sup>3</sup>Chemistry Branch, Faculty of Petroleum and Mining Engineering, Suez University, Suez 43721,  
9 Egypt.

10 \* Correspondence: jane.mellor@bioch.ox.ac.uk

11

## 12 **ABSTRACT**

13 CRISPRi, an adapted CRISPR-Cas9 system, is proposed to act as a strand-specific roadblock to repress  
14 transcription in eukaryotic cells using guide RNAs (sgRNAs) to target catalytically inactive Cas9  
15 (dCas9) and offers an alternative to genetic interventions for studying pervasive antisense  
16 transcription. Here we successfully use click chemistry to construct DNA templates for sgRNA  
17 expression and show, rather than acting simply as a roadblock, binding of sgRNA/dCas9 creates an  
18 environment that is permissive for transcription initiation and termination, thus generating novel  
19 sense and antisense transcripts. At *HMS2* in *Saccharomyces cerevisiae*, sgRNA/dCas9 targeting to the  
20 non-template strand results in antisense transcription termination, premature termination of a  
21 proportion of sense transcripts and initiation of a novel antisense transcript downstream of the  
22 sgRNA/dCas9 binding site. This redefinition of the transcriptional landscape by CRISPRi demonstrates  
23 that it is not strand-specific and highlights the controls and locus understanding required to properly  
24 interpret results from CRISPRi interventions.

## 25 INTRODUCTION

26 Eukaryotic genomes are pervasively transcribed but the effect of this inter- and intragenic  
27 transcription is not fully understood (Mellor, Woloszczuk, & Howe, 2016). Of particular interest is the  
28 function of antisense transcription, which alters the chromatin in the vicinity of sense promoters  
29 (Lavender et al., 2016; Murray et al., 2015; Pelechano & Steinmetz, 2013), and is associated with  
30 repression, activation or no change in levels of the corresponding sense transcript (Murray et al.,  
31 2015). Discerning the mechanism by which antisense transcription functions in gene regulation is  
32 confounded by the difficulty in ablating antisense transcription without direct genetic intervention  
33 (Bassett et al., 2014). A new approach, CRISPR interference (CRISPRi) (Qi et al. 2013), can circumvent  
34 these issues by avoiding the need to manipulate endogenous DNA sequences. An  
35 endonucleolytically dead version of Cas9 (dCas9) is recruited by single base pairing guide RNAs  
36 (sgRNAs) targeting the non-template (NT) DNA strand, where it blocks transcription strand-  
37 specifically at the loci tested (Lenstra, Coulon, Chow, & Larson, 2015; Qi et al., 2013). In a further  
38 adaptation, dCas9 fusion with transcriptional repressors or activators allows both negative and  
39 positive regulation of transcription respectively (Gilbert et al., 2013, 2014), but the strand-specificity  
40 is lost and thus is not suitable for strand-specific repression of antisense transcription. The sgRNA  
41 component of the CRISPRi system consists of two regions: a constant region (82 nt) that binds to  
42 dCas9 and a variable region (20 nt) that is responsible for targeting. The modular nature of the  
43 sgRNA lends itself to synthetic copper(I)-catalysed alkyne-azide cycloaddition (CuAAC) click  
44 chemistry (El-Sagheer & Brown, 2010). The stable artificial triazole DNA linker generated is  
45 biocompatible, being read and accurately copied by DNA and RNA polymerases (Birts et al., 2014;  
46 El-Sagheer & Brown, 2011; El-Sagheer, Sanzone, Gao, Tavassoli, & Brown, 2011). We show that click  
47 chemistry is an efficient method for sgRNA construction and that when combined with dCas9, these  
48 sgRNAs are as effective as sgRNAs produced from chemically synthesised full-length DNA templates  
49 at reducing levels of transcripts *in vivo*. However, it is still not completely understood how the  
50 CRISPRi system functions strand-specifically or why sgRNAs must target the non-template strand.

51 Here we use the CRISPRi system to study the effect of blocking antisense transcription at loci with  
52 well characterised sense:antisense transcript pairs. We have previously used a promoter deletion of  
53 the antisense transcript *SUT650* at the *HMS2* locus to show that *SUT650* represses *HMS2* sense  
54 transcription (Nguyen et al., 2014). Now we use CRISPRi to examine the effects of blocking *SUT650*  
55 antisense transcription to ask (i) whether *SUT650* represses *HMS2* sense transcription *without* a  
56 genetic intervention and (ii) whether CRISPRi is strand-specific using, in addition to *HMS2*, an  
57 engineered *GAL1* gene with a well characterised antisense transcript (Murray et al., 2012, 2015).

58 The main conclusion from this study is that CRISPRi at the *HMS2* locus is not fully strand-specific and  
59 results in (i) premature termination of the sense transcript and (ii) initiation of a new unstable  
60 antisense transcript in the vicinity of the sgRNA binding site. As transcription from this new antisense  
61 initiation site extends in to the *HMS2* promoter, there is no net change in *HMS2* sense transcript  
62 levels. Thus CRISPRi redefines the transcriptional landscape at *HMS2*. This suggests that routine use  
63 of CRISPRi for gene expression analysis will require rigorous analysis of transcript integrity and  
64 function before conclusions can be drawn.

## 65 **RESULTS & DISCUSSION**

### 66 **DNA templates for sgRNA production can be made using click chemistry**

67 CRISPRi-mediated transcriptional repression requires co-expression of a mature sgRNA and dCas9  
68 (Fig 1A). A small library of single-stranded DNAs, comprised of templates for sgRNA variable regions,  
69 were joined to the constant region using click chemistry (Fig. 1B) and used successfully as templates  
70 for PCR, with no significantly different efficiencies when compared to control full-length synthesised  
71 oligonucleotides (Fig. 1C). The PCR products were inserted in place of a *URA3* selection cassette in  
72 the endogenous *snR52* locus for expression of a transcript that is then processed to form the mature  
73 nuclear-retained sgRNA (Fig. 1A). Levels of dCas9 protein were uniform between strains (Fig. 1 –  
74 Figure Supplement 1). Neither insertion of *URA3* into *snR52* nor dCas9 expression in the control

75 strains affected growth rate, although strains expressing some sgRNAs grew more slowly indicating a  
76 physiological effect (Fig. 1D).

### 77 **CRISPRi represses the production of antisense transcripts at *HMS2* and *GAL1***

78 CRISPRi represses transcription when sgRNAs/dCas9 are targeted to the non-template (NT) strand  
79 next to a protospacer adjacent motif (PAM) (Qi et al., 2013) (Fig. 2A). Firstly, we used an engineered  
80 version of *GAL1* that has a stable antisense transcript (*GAL1* AS) initiating within an *ADH1* terminator  
81 inserted into the *GAL1* coding region (Murray et al., 2012) (Fig. 2B). *GAL1* AS is present in cells grown  
82 in glucose-containing media when the *GAL1* gene is repressed and is reduced as cells are switched  
83 into galactose-containing media and *GAL1* sense is induced (Fig. 2C lanes 1-3). We designed sgRNAs  
84 adjacent to two PAM sequences on the non-template strand near the antisense transcription start  
85 site (TSS) (AS+28NT and AS+112NT) and a third strand-specificity control sgRNA on the template  
86 strand in this region (AS+93T) (Fig. 2B). Only sgRNA AS+112NT/dCas9 caused significant ( $p=0.016$ )  
87 reduction in *GAL1* antisense transcript levels, as assessed by Northern blotting (Fig. 2C,D).

88 Next, we examined the *HMS2* locus which has a stable antisense transcript, *SUT650*, initiating within  
89 the 3' coding region of *HMS2* (Nguyen et al., 2014; Pelechano, Wei, & Steinmetz, 2013). We  
90 designed three *SUT650*-targeting sgRNAs, one acting as a control located 44 nucleotides upstream of  
91 the *SUT650* TSS on the non-template strand (AS-44NT), and two sgRNAs, AS+148NT and AS+181NT,  
92 targeting sequences downstream of the TSS (Fig. 2E). AS+148NT/dCas9 significantly ( $p=0.011$ )  
93 reduced *SUT650* (Fig. 2F lanes 1&3, 2G) and this repression was comparable for the clicked and  
94 control full-length synthetic constructs (Fig. 2G). However, there was no obvious effect of the other  
95 two sgRNAs/dCas9 on *SUT650* levels (Fig. 2F lanes 1, 4&5, 2G). CRISPR efficiency has been linked to  
96 nucleosome occupancy (Horlbeck, Witkowsky, et al., 2016; Isaac et al., 2016) but we found no  
97 correlation between the level of repression and the nucleosome occupancy (Knight et al., 2014) at  
98 each of the *SUT650* sgRNA target regions (Fig. 2 – Figure Supplement 1). However, other factors such  
99 as sequence determinants can also influence repression (Horlbeck, Gilbert, & Villalta, 2016). These

100 results at *GAL1* and *HMS2* confirm CRISPRi is suitable for reducing levels of antisense transcripts in  
101 yeast but controls are needed for each sgRNA designed to ensure that repression has been achieved.

### 102 **CRISPRi repression of *SUT650* induces a new shorter antisense transcript at *HMS2***

103 At *HMS2*, sgRNA AS+148NT/dCas9 was able to reduce *SUT650* levels significantly (Fig. 2F,G). Since  
104 *SUT650* is a substrate for the major cytoplasmic 5'-3' exonuclease Xrn1 (Fig. 2F, lanes 1&2), we  
105 investigated whether the CRISPRi-induced *SUT650* reduction was due to direct repression of  
106 antisense transcription and/or a reduction in *SUT650* stability. Whilst *SUT650* was not stabilised  
107 upon *XRN1* deletion in the strain expressing AS+148NT/dCas9, supporting previous studies that  
108 CRISPRi operates via a transcriptional block (Qi et al., 2013) (Fig. 2F, lanes 3&6, transcript B), we  
109 detected a shorter antisense transcript (Fig 2F, lane 6, transcript B<sup>t</sup>). To map transcript B<sup>t</sup>, we used a  
110 series of Northern blotting probes across the locus (Fig. 2H). With antisense-specific probes H1 and  
111 H2 in the *HMS2* gene promoter and 5' coding region respectively, we could detect transcript B<sup>t</sup>,  
112 indicating that it extends into the *HMS2* sense promoter. However, probe H4 at the 3' end of the  
113 *HMS2* gene was unable to hybridise to B<sup>t</sup>, indicating that B<sup>t</sup> initiates upstream of this site. So whilst  
114 CRISPRi successfully blocked the original *SUT650*, a new Xrn1-sensitive unstable antisense transcript  
115 (B<sup>t</sup>) was created. This is potentially due to changes in the chromatin structure caused by  
116 AS+148NT/dCas9 binding to this region (Horlbeck, Witkowsky, et al., 2016; Isaac et al., 2016),  
117 creating an environment that is permissive for transcription initiation (Murray et al., 2012). We note  
118 that using probe H4 we were also unable to detect *SUT650* initiating from its WT start site but  
119 terminating at the AS+148NT binding site, due to its small size (~148 nt).

### 120 **CRISPRi-induced *GAL1* AS repression does not affect the *GAL1* sense transcript**

121 We tested whether *GAL1* AS repression by AS+112NT/dCas9 affected the *GAL1* sense transcript.  
122 Previously we mutated a TATA-like sequence to ablate antisense transcription but observed no  
123 difference in *GAL1* sense transcript levels in the population (Murray et al., 2015). Using CRISPRi, we  
124 also observed no significant change in *GAL1* sense transcript levels or size (Fig. 3A,B). To support a

125 strand-specific transcriptional block of AS transcription, *GAL1* sense transcript polyA site usage was  
126 unaffected by sgRNA AS+112NT/dCas9 (Fig. 3C). Furthermore, *XRN1* deletion in this strain also did  
127 not affect polyA site usage, ruling out a partial double-stranded transcriptional block and subsequent  
128 destabilisation of the resulting truncated sense transcript (Fig. 3C).

### 129 **CRISPRi-induced *SUT650* repression truncates the *HMS2* sense transcript**

130 Previous work shows that reducing *SUT650* transcription increases *HMS2* sense transcript levels  
131 (Nguyen et al., 2014). However, blocking *SUT650* by AS+148NT/dCas9 did not similarly increase  
132 *HMS2* sense levels (Fig. 3D, lanes 1&3). To our surprise, in addition to the full-length *HMS2* sense  
133 transcript (A), we detected a considerably shortened *HMS2* sense transcript (A<sup>t</sup>). Since the combined  
134 levels of the truncated and full-length transcripts are similar to those in the strain not expressing an  
135 sgRNA, independent of the presence of *XRN1* (Fig. 3D, lanes 1&3 or 2&6), we hypothesised that the  
136 AS+148NT/dCas9 complex bound within the *HMS2* coding region may be causing partial premature  
137 sense transcription termination, leading to transcript A<sup>t</sup>. Thus, we mapped the 3' end of *HMS2* S by  
138 Northern blotting using a series of strand-specific probes across the locus (Fig. 3E). Both transcripts A  
139 and A<sup>t</sup> could clearly be detected using the probes upstream of the AS+148NT/dCas9 binding site  
140 (probes H1, H2, H3) but the truncated transcript was undetectable using probe H4 downstream of  
141 this site. Thus the transcriptional block caused by AS+148NT/dCas9 is not strand-specific and re-  
142 defines the transcriptional landscape at the *HMS2* locus by creating a chromatin environment that is  
143 suitable for both transcription initiation and termination. As an additional control, we designed  
144 three sgRNAs to block the *HMS2* sense transcripts (S+77NT, S+106NT, S+179NT) and monitored their  
145 effects on both *HMS2* sense and antisense transcripts (Fig. 3 – Figure Supplement 1). However, we  
146 observed no effect on either levels or integrity.

### 147 **CRISPRi-induced antisense repression at *HMS2* and *GAL1* is not as efficient as previous methods**

148 We compared the repression efficiency of CRISPRi with our previously used genetic interventions. At  
149 *GAL1*, mutation of a TATA-like sequence within the *ADH1* terminator greatly reduced the level of the

150 *GAL1* antisense transcript (Fig. 4A,B) (Murray et al 2015). *XRN1* deletion in this strain only slightly  
151 increased *GAL1* AS levels, suggesting that most repression was at the level of transcription rather  
152 than altering transcript stability (Fig. 4B,C). By contrast, *XRN1* deletion in the strain expressing  
153 AS+112NT/dCas9 did result in some upregulation of *GAL1* AS (Fig. 4B,C), indicating that antisense  
154 transcript repression was not as great in this strain. Unlike at *HMS2* (Fig. 2F,G), this stabilised *GAL1*  
155 AS transcript was the same size as in the control and so likely represents stabilisation of the  
156 transcripts escaping repression rather than novel transcripts.

157 Next we compared the efficacy of AS+148NT/dCas9 with previous experiments to ablate *SUT650*,  
158 where we replaced the entire *HMS2* coding region, including the antisense TSS with the *URA3* coding  
159 region (*HMS2:URA3*) (Nguyen et al., 2014). This successful block of *SUT650* transcription increased  
160 levels of the *HMS2* sense transcript, the di-cistronic *HMS2-BAT2* transcript and consequently  
161 decreased levels of the downstream gene, *BAT2*, due to transcriptional interference (Fig. 4D-F).  
162 Whilst CRISPRi resulted in a similar decrease in *SUT650* as *HMS2:URA3*, neither the *HMS2*, *BAT2* nor  
163 *HMS2-BAT2* di-cistronic transcripts were altered (Fig. 4F). The discovery that whilst AS+148NT/dCas9  
164 represses *SUT650*, a new unstable *HMS2* antisense transcript is induced and the sense transcript is  
165 prematurely terminated could explain why blocking *SUT650* using CRISPRi and the *URA3* gene body  
166 replacement strategies did not give the same results (Fig. 4F). Thus CRISPRi is not as effective as a  
167 genetic mutation in reducing levels of either the *GAL1* or *HMS2* AS transcripts.

## 168 **Concluding remarks**

169 Although CRISPRi has been used to strand-specifically repress antisense transcription at *GAL10*  
170 (Lenstra et al., 2015) and *GAL1* (this work), here we demonstrate that this is not true at *HMS2*. This  
171 may reflect the vastly different transcription levels for the galactose inducible genes (high)  
172 compared to *HMS2* (low). Furthermore, a study in human K562 cells found that CRISPRi-induced  
173 repression did not correlate with which strand was targeted at 49 genes, although the mechanism  
174 behind this observation was not investigated (Gilbert et al., 2014).

175 This work extends our previous hypothesis (Nguyen et al., 2014), allowing us to propose that, rather  
176 than acting as a roadblock, the binding of the sgRNA/dCas9 complex at *HMS2* creates a new  
177 chromatin environment, which is permissible for transcription initiation and termination. Thus, new  
178 transcription units are generated that result in novel sense and antisense transcripts of varying  
179 stabilities that are therefore not always detectable. This redefinition of the transcriptional landscape  
180 highlights the levels of controls and locus understanding needed before results from using CRISPRi  
181 can be interpreted.

## 182 **AUTHOR CONTRIBUTIONS**

183 Conception and design: FSH, AE-S, TB, JM; Acquisition of data: FSH, AR, AN; Analysis and  
184 interpretation of the data: FSH, AR, AN, JM; Drafting or revising the manuscript: FSH, TB, JM;  
185 Contributed unpublished, essential data, or reagents: AE-S.

## 186 **FUNDING**

187 The work was funded by the BBSRC (BB/J001694/2).

## 188 **CONFLICT OF INTEREST**

189 J.M holds stock in Oxford BioDynamics Ltd., Chronos Therapeutics Ltd., and Sibelius Ltd. but these  
190 holdings present no conflict of interest with work in this article. The other authors have declared no  
191 conflicts of interest.

## 192 **ACKNOWLEDGEMENTS**

193 The authors thank Jack Feltham for assistance with sgRNA template construction.

194



195 **REFERENCES**

- 196 Bassett, A. R., Akhtar, A., Barlow, D. P., Bird, A. P., Brockdorff, N., Duboule, D., ... Ponting, C. P.  
197 (2014). Considerations when investigating lncRNA function in vivo. *eLife*, 3(August2014), 1–14.  
198 <http://doi.org/10.7554/eLife.03058>
- 199 Birts, C. N., Sanzone, A. P., El-Sagheer, A. H., Blaydes, J. P., Brown, T., & Tavassoli, A. (2014).  
200 Transcription of click-linked DNA in human cells. *Angewandte Chemie - International Edition*,  
201 53(9), 2362–2365. <http://doi.org/10.1002/anie.201308691>
- 202 Dicarlo, J. E., Norville, J. E., Mali, P., Rios, X., Aach, J., & Church, G. M. (2013). Genome engineering in  
203 *Saccharomyces cerevisiae* using CRISPR-Cas systems. *Nucleic Acids Research*, 41(7), 4336–4343.  
204 <http://doi.org/10.1093/nar/gkt135>
- 205 El-Sagheer, A. H., & Brown, T. (2010). Click chemistry with DNA. *Chemical Society Reviews*, 39(4),  
206 1388–1405. <http://doi.org/10.1039/b901971p>
- 207 El-Sagheer, A. H., & Brown, T. (2011). Efficient RNA synthesis by in vitro transcription of a triazole-  
208 modified DNA template. *Chemical Communications (Cambridge, England)*, 47(44), 12057–8.  
209 <http://doi.org/10.1039/c1cc14316f>
- 210 El-Sagheer, A. H., Sanzone, A. P., Gao, R., Tavassoli, A., & Brown, T. (2011). Biocompatible artificial  
211 DNA linker that is read through by DNA polymerases and is functional in *Escherichia coli*.  
212 *Proceedings of the National Academy of Sciences of the United States of America*, 108(28),  
213 11338–43. <http://doi.org/10.1073/pnas.1101519108>
- 214 Gilbert, L. A., Horlbeck, M. A., Adamson, B., Villalta, J. E., Chen, Y., Whitehead, E. H., ... Weissman, J.  
215 S. (2014). Genome-scale CRISPR-mediated control of gene repression and activation. *Cell*,  
216 159(3), 647–661. <http://doi.org/10.1016/j.cell.2014.09.029>
- 217 Gilbert, L. A., Larson, M. H., Morsut, L., Liu, Z., Brar, G. A., Torres, S. E., ... Qi, L. S. (2013). CRISPR-  
218 mediated modular RNA-guided regulation of transcription in eukaryotes. *Cell*, 154(2), 442–451.  
219 <http://doi.org/10.1016/j.cell.2013.06.044>
- 220 Horlbeck, M. A., Gilbert, L. A., & Villalta, J. E. (2016). Compact and highly active next-generation  
221 libraries for CRISPR-mediated gene repression and activation. *eLife*, 9, 1–20.  
222 <http://doi.org/10.7554/eLife.19760>
- 223 Horlbeck, M. A., Witkowsky, L. B., Guglielmi, B., Replogle, J. M., Gilbert, L. A., Villalta, J. E., ...  
224 Weissman, J. S. (2016). Nucleosomes impede cas9 access to DNA in vivo and in vitro. *eLife*,  
225 5(MARCH2016), 1–21. <http://doi.org/10.7554/eLife.12677>
- 226 Isaac, R. S., Jiang, F., Doudna, J. A., Lim, W. A., Narlikar, G. J., & Almeida, R. A. (2016). Nucleosome  
227 breathing and remodeling constrain CRISPR-Cas9 function. *eLife*, 5, e13450.  
228 <http://doi.org/10.7554/eLife.13450>
- 229 Knight, B., Kubik, S., Ghosh, B., Bruzzone, M. J., Geertz, M., Martin, V., ... Shore, D. (2014). Two  
230 distinct promoter architectures centered on dynamic nucleosomes control ribosomal protein  
231 gene transcription. *Genes and Development*, 28(15), 1695–1709.  
232 <http://doi.org/10.1101/gad.244434.114>
- 233 Lavender, C. A., Cannady, K. R., Hoffman, J. A., Trotter, K. W., Gilchrist, D. A., Bennett, B. D., ...  
234 Archer, T. K. (2016). Downstream antisense transcription predicts genomic features that define  
235 the specific chromatin environment at mammalian promoters. *PLOS Genetics*, 12(8), e1006224.  
236 <http://doi.org/10.1371/journal.pgen.1006224>
- 237 Lenstra, T. L., Coulon, A., Chow, C. C., & Larson, D. R. (2015). Single-Molecule Imaging Reveals a

- 238 Switch between Spurious and Functional ncRNA Transcription. *Molecular Cell*, 60, 1–14.  
239 <http://doi.org/10.1016/j.molcel.2015.09.028>
- 240 Mali, P., Yang, L., Esvelt, K. M., Aach, J., Guell, M., Dicarlo, J. E., ... Church, G. M. (2013). RNA-guided  
241 human genome engineering via Cas9. *Science*, 339(February), 823–827.  
242 <http://doi.org/10.1126/science.1232033>
- 243 Mellor, J., Woloszczuk, R., & Howe, F. S. (2016). The Interleaved Genome. *Trends in Genetics*, 32(1),  
244 57–71. <http://doi.org/10.1016/j.tig.2015.10.006>
- 245 Murray, S. C., Haenni, S., Howe, F. S., Fischl, H., Chocian, K., Nair, A., & Mellor, J. (2015). Sense and  
246 antisense transcription are associated with distinct chromatin architectures across genes.  
247 *Nucleic Acids Research*, 43(16), 7823–7837. <http://doi.org/10.1093/nar/gkv666>
- 248 Murray, S. C., Serra Barros, A., Brown, D. A., Dudek, P., Ayling, J., & Mellor, J. (2012). A pre-initiation  
249 complex at the 3'-end of genes drives antisense transcription independent of divergent sense  
250 transcription. *Nucleic Acids Research*, 40(6), 2432–44. <http://doi.org/10.1093/nar/gkr1121>
- 251 Nguyen, T., Fischl, H., Howe, F. S., Woloszczuk, R., Barros, A. S., Xu, Z., ... Mellor, J. (2014).  
252 Transcription mediated insulation and interference direct gene cluster expression switches.  
253 *eLife*, 3, 1–21. <http://doi.org/10.7554/eLife.03635>
- 254 Pelechano, V., & Steinmetz, L. M. (2013). Gene regulation by antisense transcription. *Nature*  
255 *Reviews. Genetics*, 14(12), 880–93. <http://doi.org/10.1038/nrg3594>
- 256 Pelechano, V., Wei, W., & Steinmetz, L. M. (2013). Extensive transcriptional heterogeneity revealed  
257 by isoform profiling. *Nature*, 497(7447), 127–31. <http://doi.org/10.1038/nature12121>
- 258 Pliatsika, V., & Rigoutsos, I. (2015). “Off-Spotter”: very fast and exhaustive enumeration of genomic  
259 lookalikes for designing CRISPR/Cas guide RNAs. *Biology Direct*, 10(1), 4.  
260 <http://doi.org/10.1186/s13062-015-0035-z>
- 261 Qi, L. S., Larson, M. H., Gilbert, L. A., Doudna, J. A., Weissman, J. S., Arkin, A. P., & Lim, W. A. (2013).  
262 Repurposing CRISPR as an RNA-guided platform for sequence-specific control of gene  
263 expression. *Cell*, 152(5), 1173–83. <http://doi.org/10.1016/j.cell.2013.02.022>
- 264

## 265 MATERIALS AND METHODS

### 266 sgRNA design

267 PAM sequences within 200 bp of the TSS in question were identified and the 20 bp immediately  
268 adjacent to these were used to design the variable regions of the sgRNAs. These sequences were run  
269 through an off-spotter algorithm (<https://cm.jefferson.edu/Off-Spotter//>) to minimise any off-target  
270 effects (Pliatsika & Rigoutsos, 2015). The sequence for the engineered constant region and *SUP4*  
271 terminator were taken from (Dicarlo et al., 2013; Mali et al., 2013). The *HMS2* sgRNA templates were  
272 synthesised as two DNA oligonucleotides to be joined by click chemistry, with the majority of the  
273 constant region on one oligonucleotide that could be used for all reactions. To increase the  
274 efficiency of the click reaction, the click linkage was designed between a dCpT dinucleotide within  
275 the Cas9 handle region. The sequences for the *HMS2* and *GAL1* sgRNAs are shown in Supplementary  
276 File 1. Full-length sgRNA templates were also synthesised for the *GAL1* sgRNAs and as a control for  
277 the *HMS2* click chemistry constructs (Eurofins Genomics).

### 278 Click chemistry

279 Single-stranded DNA oligonucleotides complementary to the constant and variable sgRNA regions  
280 were synthesised by standard phosphoramidite oligonucleotide synthesis with 3'-alkyne or 5'-azido  
281 modifications respectively (El-Sagheer et al., 2011) (Supplementary File 1). The click chemistry  
282 reaction was performed with a Cu<sup>1</sup> catalyst and 24-30 nt splint DNAs (El-Sagheer et al., 2011). PCR  
283 was performed for second strand synthesis, amplification and incorporation of sequences  
284 homologous to the site of insertion in *S. cerevisiae*. PCR efficiencies were obtained using qPCR  
285 performed three times with four serial 10-fold dilutions in triplicate (Corbett 6000 Rotorgene  
286 software).

### 287 Strain construction

288 dCas9, without fusion to a transcriptional repressor domain, was expressed from a plasmid (# 46920  
289 Addgene (Qi et al., 2013)) under the control of the *TDH3* promoter. The DNA templates for sgRNA  
290 production were integrated in place of an exogenous *URA3* cassette immediately downstream of the  
291 splice site in the endogenous *snR52* locus using homologous recombination followed by 5-FOA  
292 selection. Correct insertion was confirmed by genomic DNA sequencing. *SNR52* is a Pol III-  
293 transcribed C/D box small nucleolar RNA (snoRNA) gene and so does not undergo extensive post-  
294 transcriptional processing such as capping and polyadenylation, and transcripts from this locus are  
295 retained in the nucleus. Additionally, the locus contains a self-splicing site that produces a mature

296 transcript without additional machinery, allowing precise production of a mature sgRNA without any  
297 unwanted extensions. Primer sequences for strain construction are listed in Supplementary File 2.

### 298 **Yeast growth**

299 The strains used in this study are listed in Supplementary File 3. Strains were grown to mid-log at  
300 30°C in complete synthetic media lacking leucine (for dCas9 plasmid selection). For experiments  
301 studying the *GAL1* locus, yeast were grown to mid-log in rich media (YP 2% D/YP 2% Gal) so that the  
302 *GAL1* induction kinetics were similar to what we had observed previously (Murray et al., 2012,  
303 2015). dCas9 expression was unaffected by the temporary absence of plasmid selection (Fig. 1 –  
304 Figure Supplement 1).

### 305 **Yeast growth controls**

306 Assessment of growth in liquid culture (CSM-leucine) was achieved using a Bioscreen  
307 spectrophotometer that automatically measures the optical density of cultures at 30°C every 20 min  
308 for 24 h. Doubling times were extracted from the gradient of the curves during logarithmic growth.

### 309 **Northern blotting**

310 Northern blotting was performed as before (Murray et al., 2012; Nguyen et al., 2014) using  
311 asymmetric PCR or *in vitro* transcription with T7 RNA polymerase to generate the radioactive strand-  
312 specific probes for *GAL1* and *HMS2* respectively. Primers for these reactions are listed in  
313 Supplementary File 4. Northern blots were quantified using ImageJ and images acquired using a  
314 Phosphorimager. Images in the figures are scans of exposures to X-ray film.

### 315 **Western blotting**

316 dCas9 expression was confirmed after each experiment using an anti-Cas9 antibody (Diagenode  
317 C15310258) at 1:5000 dilution and anti-Tubulin (Abcam ab6160) at 1:3333.

### 318 **3' RACE mapping**

319 Mapping of the 3' end of the *GAL1* sense transcript was performed as (Nguyen et al., 2014). Primers  
320 are listed in Supplementary File 5.

321 FIGURED AND FIGURE LEGENDS

322 Figure 1. Experimental strategy for sgRNA template synthesis and incorporation into yeast.

Figure 1

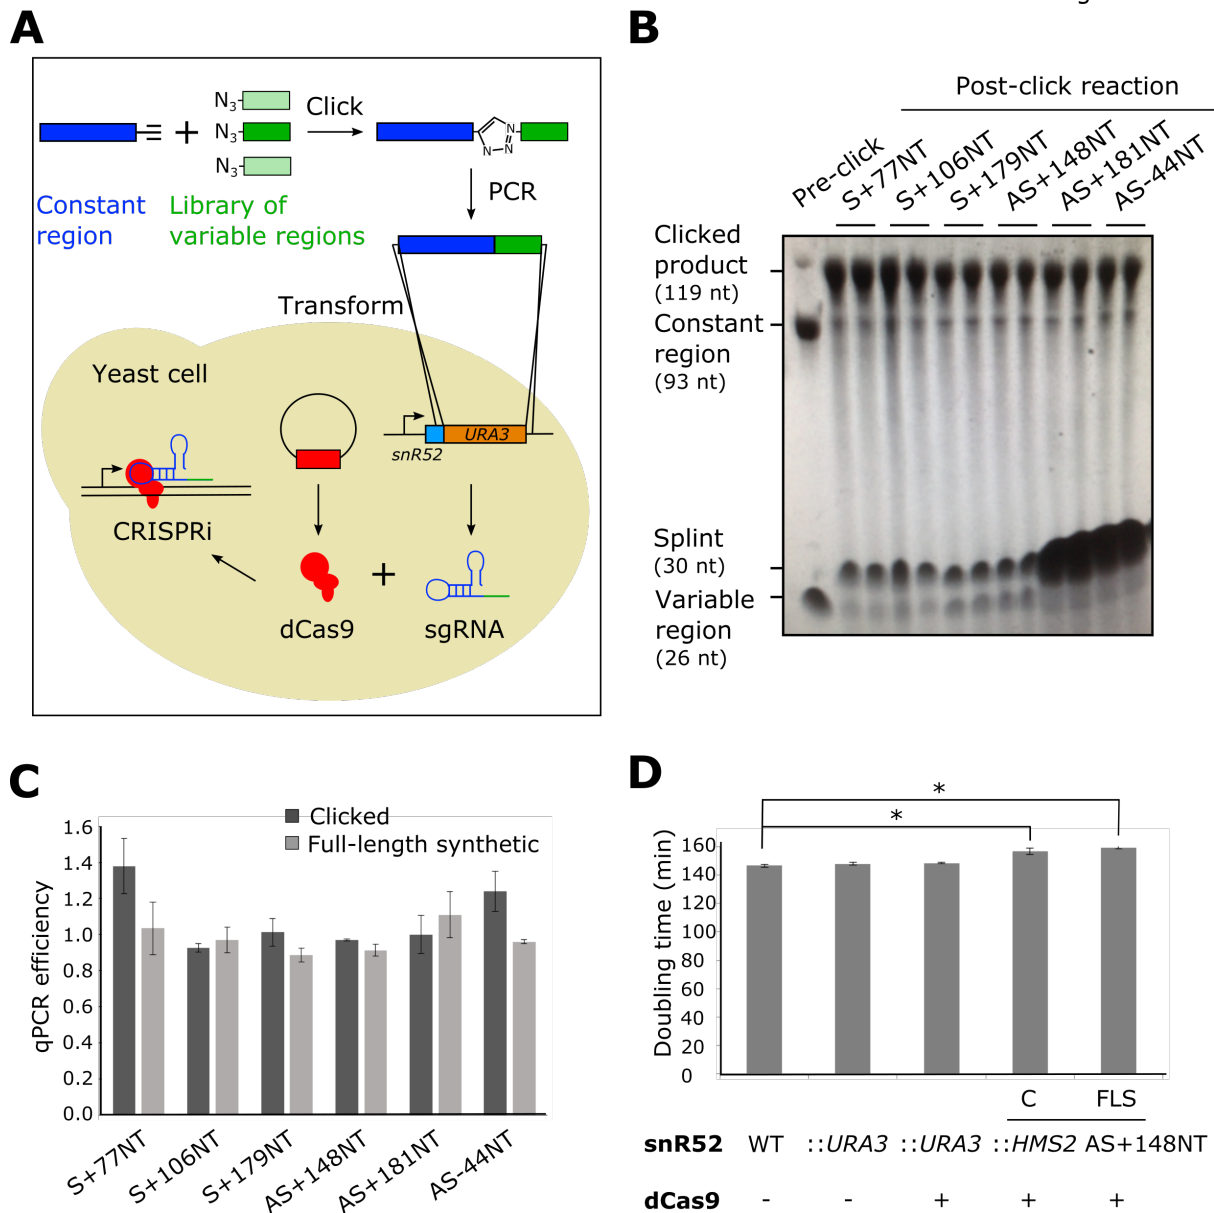

323

324 **A.** An outline of the experiment. Templates for sgRNA production were generated using a click  
 325 chemistry reaction between a single-stranded DNA oligonucleotide with a 3' alkyne group encoding  
 326 the constant region (dark blue) and a number of single-stranded DNA oligonucleotides with 5' azido  
 327 groups encoding the different variable regions (green). The resulting single-stranded DNA  
 328 oligonucleotide was purified, amplified by PCR and transformed into yeast to replace the *URA3*  
 329 selection cassette that had previously been introduced into the endogenous *snR52* locus. Correct  
 330 insertion was confirmed by Sanger sequencing. The expression of the sgRNA is driven from the  
 331 endogenous RNA polymerase III *snR52* promoter and processed to produce a mature sgRNA. The

332 sgRNA couples with enzymatically dead Cas9 (dCas9, red) expressed under the control of the *TDH3*  
 333 promoter off a plasmid to block transcription. See Methods for more detail. **B.** A polyacrylamide gel  
 334 visualised by UV shadowing reveals a high efficiency of the click reaction for all the *HMS2* constructs  
 335 (see Figures 2E and Figure 3 – Figure Supplement 1 for positions of the sgRNA binding sites). The  
 336 sizes of the variable region, DNA splint, constant region and clicked product are indicated. **C.** PCR  
 337 efficiencies of the clicked and full-length synthetic DNA oligonucleotides as measured by qPCR with a  
 338 serial dilution series. N=3, errors are standard error of the mean (SEM), all differences are not  
 339 significant  $p > 0.05$ . **D.** Doubling times (min) of the indicated yeast strains grown in complete synthetic  
 340 media minus leucine. C, strains constructed using clicked oligonucleotides; FLS, strains constructed  
 341 using full-length synthetic oligonucleotides. N=10, errors are SEM, \*  $p < 0.05$ .

342

343 **Figure 1 - Figure Supplement 1. Levels of dCas9 protein in the experimental strains.**

Figure S1:

***HMS2* strains:**

***GAL1* strains:**

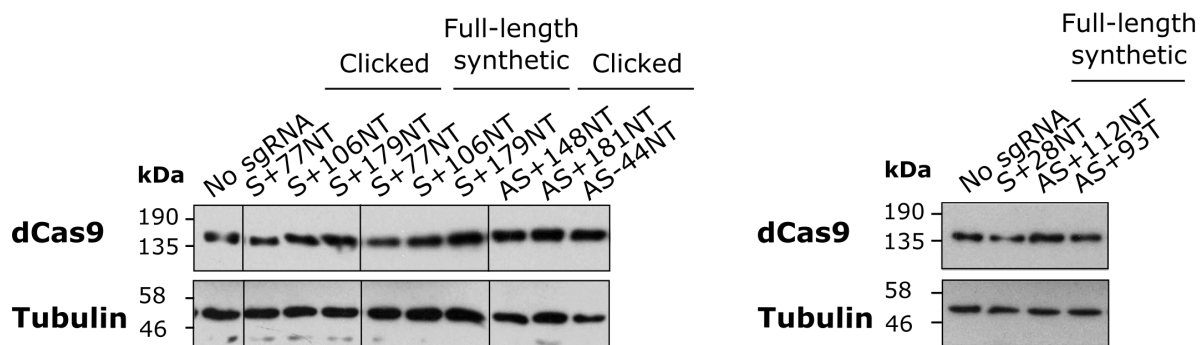

344

345 A Western blot showing levels of dCas9 produced in the strains expressing the indicated sgRNAs  
 346 against *HMS2* (left panel) and *GAL1* (right panel). Tubulin levels are used as a loading control. Images  
 347 are taken from the same gels with the same exposure times but with some lanes spliced out  
 348 (indicated with vertical lines).

349

350 **Figure 2. CRISPRi reduces antisense transcripts at *GAL1* and *HMS2*.**

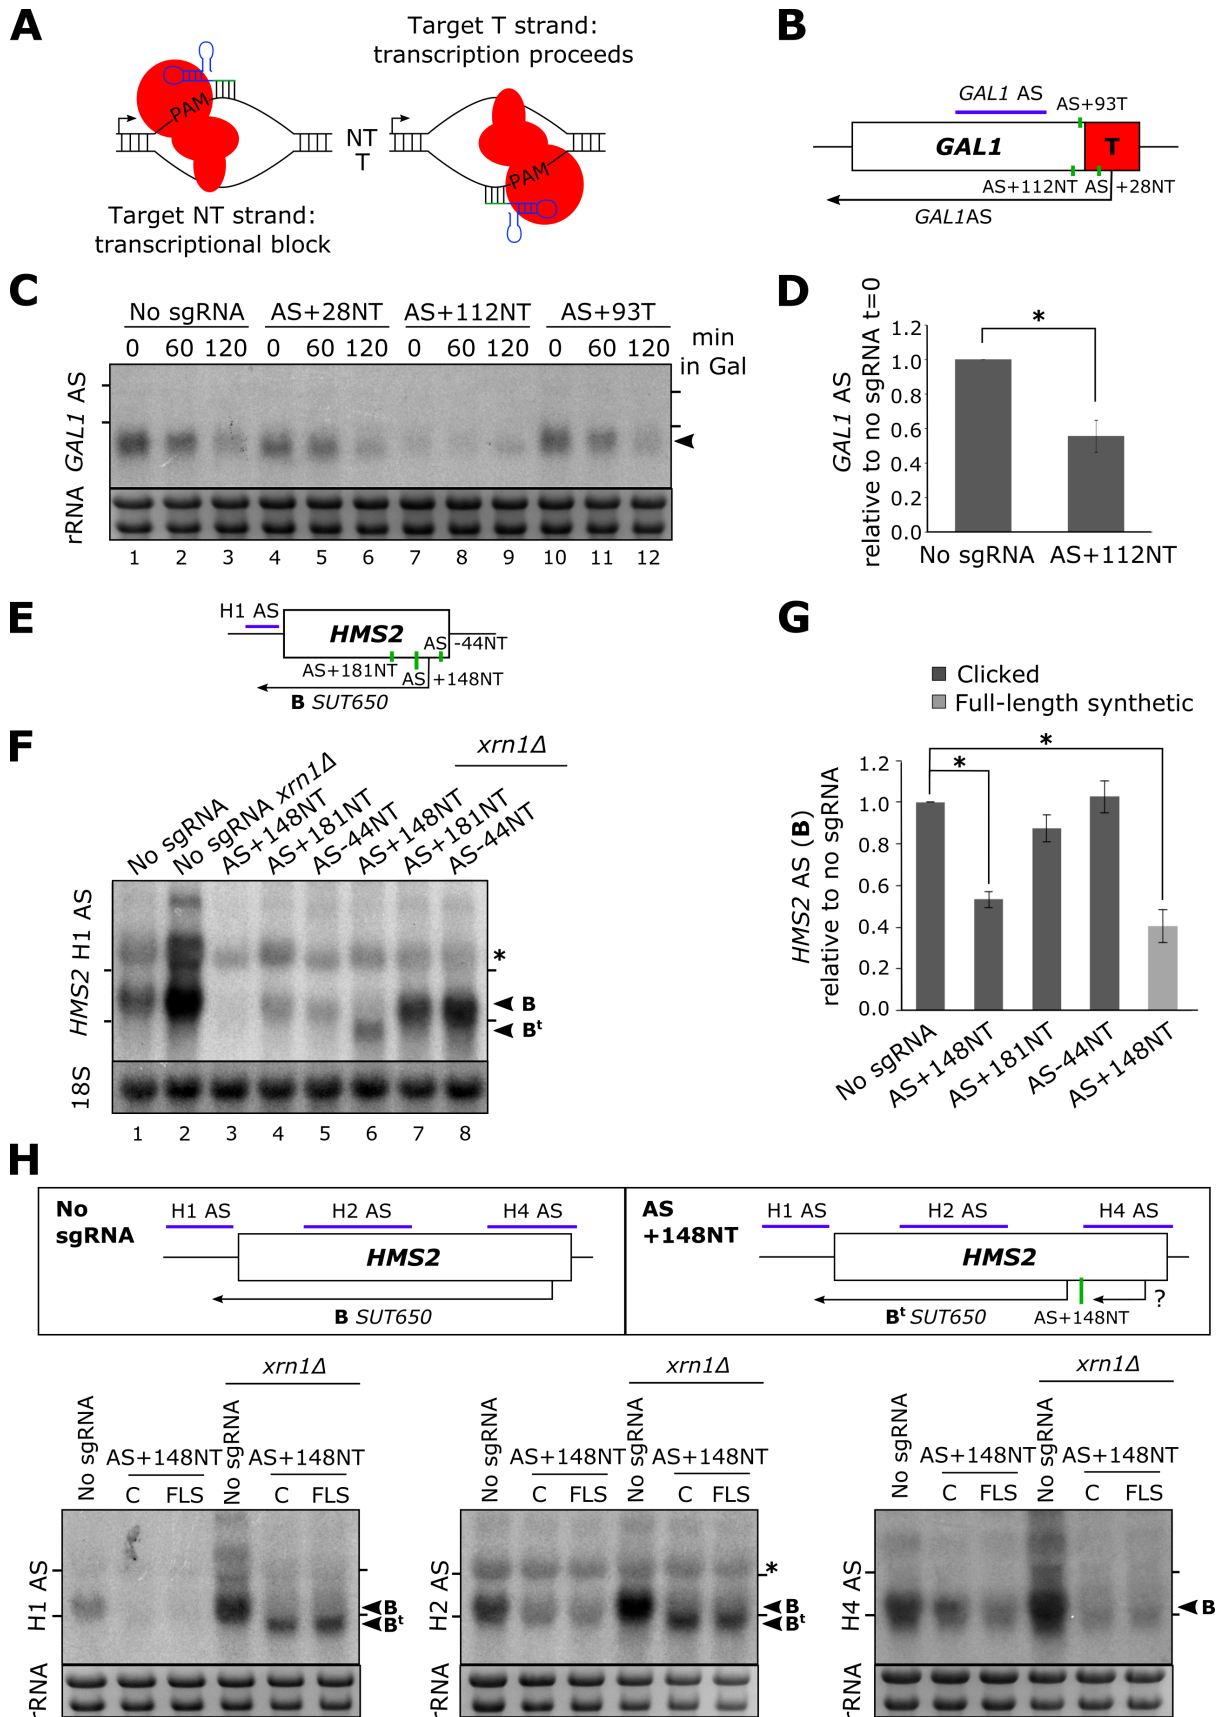

351

352 **A.** A schematic demonstrating the previously reported requirement of non-template strand targeting  
353 by the sgRNA/dCas9 complex for strand-specific transcriptional repression. Arrows indicate the  
354 direction of transcription. NT, non-template; T, template; red, dCas9; PAM, protospacer adjacent  
355 motif; green/blue, sgRNA. **B.** A schematic of the engineered *GAL1* locus showing the site of insertion  
356 of the *ADH1* terminator (T, red box), the transcription start site for the stable *GAL1* antisense  
357 transcript and the positions of the designed sgRNAs (green vertical lines) targeting the non-template  
358 (AS+28NT, AS+112NT) and template (AS+93NT) strands with respect to antisense transcription. The  
359 position of the Northern blotting probe detecting the *GAL1* AS transcript is shown in purple. **C.** A  
360 Northern blot showing the reduction in *GAL1* antisense transcript (black arrowhead) in the strain  
361 expressing sgRNA AS+112NT/dCas9 relative to the no sgRNA control (*GAL1:ADH1t snR52::URA3* with  
362 dCas9). sgRNAs AS+28NT and AS+93T do not alter *GAL1* AS levels. Samples were taken from cells  
363 grown in glucose (t=0) and at the indicated times after transfer to galactose-containing media (min).  
364 Positions of the rRNA are indicated by the short horizontal lines. Ethidium bromide-stained rRNA is  
365 used as loading control. **D.** Quantification of Northern blotting for the *GAL1* AS transcript at t=0 in  
366 the control no sgRNA strain and the strain with sgRNA AS+112NT. N=6, errors are SEM, \* p<0.05. **E.** A  
367 map of the *HMS2* locus showing the *HMS2* AS transcript, *SUT650* (black arrow, transcript B) and  
368 positions of the three sgRNAs targeting *SUT650* (green vertical lines). The position of the Northern  
369 blotting probe to detect *SUT650* (H1 AS) is shown by the purple line. **F.** A Northern blot probed with  
370 *HMS2* antisense probe H1 (see schematic in (E)) showing the level of *SUT650* (black arrowhead,  
371 transcript B) in the no sgRNA control (*snR52::URA3* with dCas9) strain and strains expressing the  
372 indicated antisense-targeting sgRNAs. Deletion of *XRN1* allows detection of a shorter antisense  
373 transcript (B<sup>t</sup>) in the strain expressing AS+148NT. Positions of the rRNA are indicated by the short  
374 horizontal lines. \*represents cross-hybridisation with the 26S rRNA. A blot probed for the 18S rRNA  
375 is used as loading control. **G.** Quantification of the level of *SUT650* (transcript B) reduction in the  
376 strains expressing each of the 3 antisense sgRNAs relative to the control no sgRNA strain. N=4-8,  
377 errors represent SEM, \*p<0.05. Click-linked and full-length synthetic sgRNA AS+148NT templates  
378 behave similarly. **H.** Northern blots with a series of *HMS2* antisense-specific probes. A new shorter  
379 antisense transcript (B<sup>t</sup>) can be detected upon *XRN1* deletion in the strains expressing sgRNA  
380 AS+148NT/dCas9. Two clones of the CRISPRi strains produced using clicked (C) or full-length  
381 synthetic (FLS) oligos for strain construction are shown. Positions of the antisense-specific probes  
382 (purple) and the site of sgRNA AS+148NT/dCas9 binding (green vertical line) are shown in the  
383 schematic. Positions of the rRNA on the Northern blot are indicated by the short horizontal lines.  
384 \*represents cross-hybridisation with the 26S rRNA. Ethidium bromide-stained rRNA is used as  
385 loading control.



386 **Figure 2 - Figure Supplement 1. Nucleosome occupancy over the sgRNA target sites does not anti-**  
387 **correlate with level of repression.**

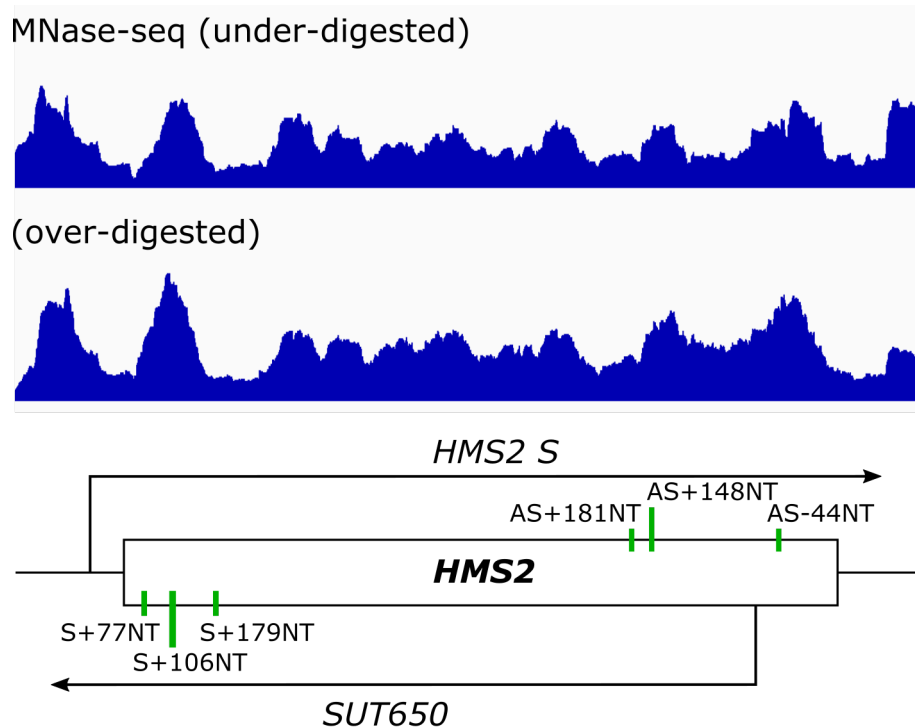

| sgRNA    | Relative nucleosome occupancy |       |
|----------|-------------------------------|-------|
|          | Under                         | Over  |
| S+77NT   | 4.295                         | 14.17 |
| S+106NT  | 16.04                         | 33.99 |
| S+179NT  | 9.391                         | 11.51 |
| AS+148NT | 16.53                         | 19.36 |
| AS+181NT | 11.97                         | 15.09 |
| AS-44NT  | 22.7                          | 28.27 |

388

389 Nucleosome occupancy map for *HMS2* as measured by sequencing of a sample that has been under-  
390 and over-digested with MNase (Knight et al., 2014). The schematic underneath shows the positions  
391 of the sgRNA targeting sites. Relative nucleosome occupancy at each sgRNA site is shown in the  
392 table for the under- and over-digested samples.

393

394 **Figure 3. *HMS2* and *GAL1* sense transcripts are differently affected by blocking of their respective**  
 395 **antisense transcripts.**

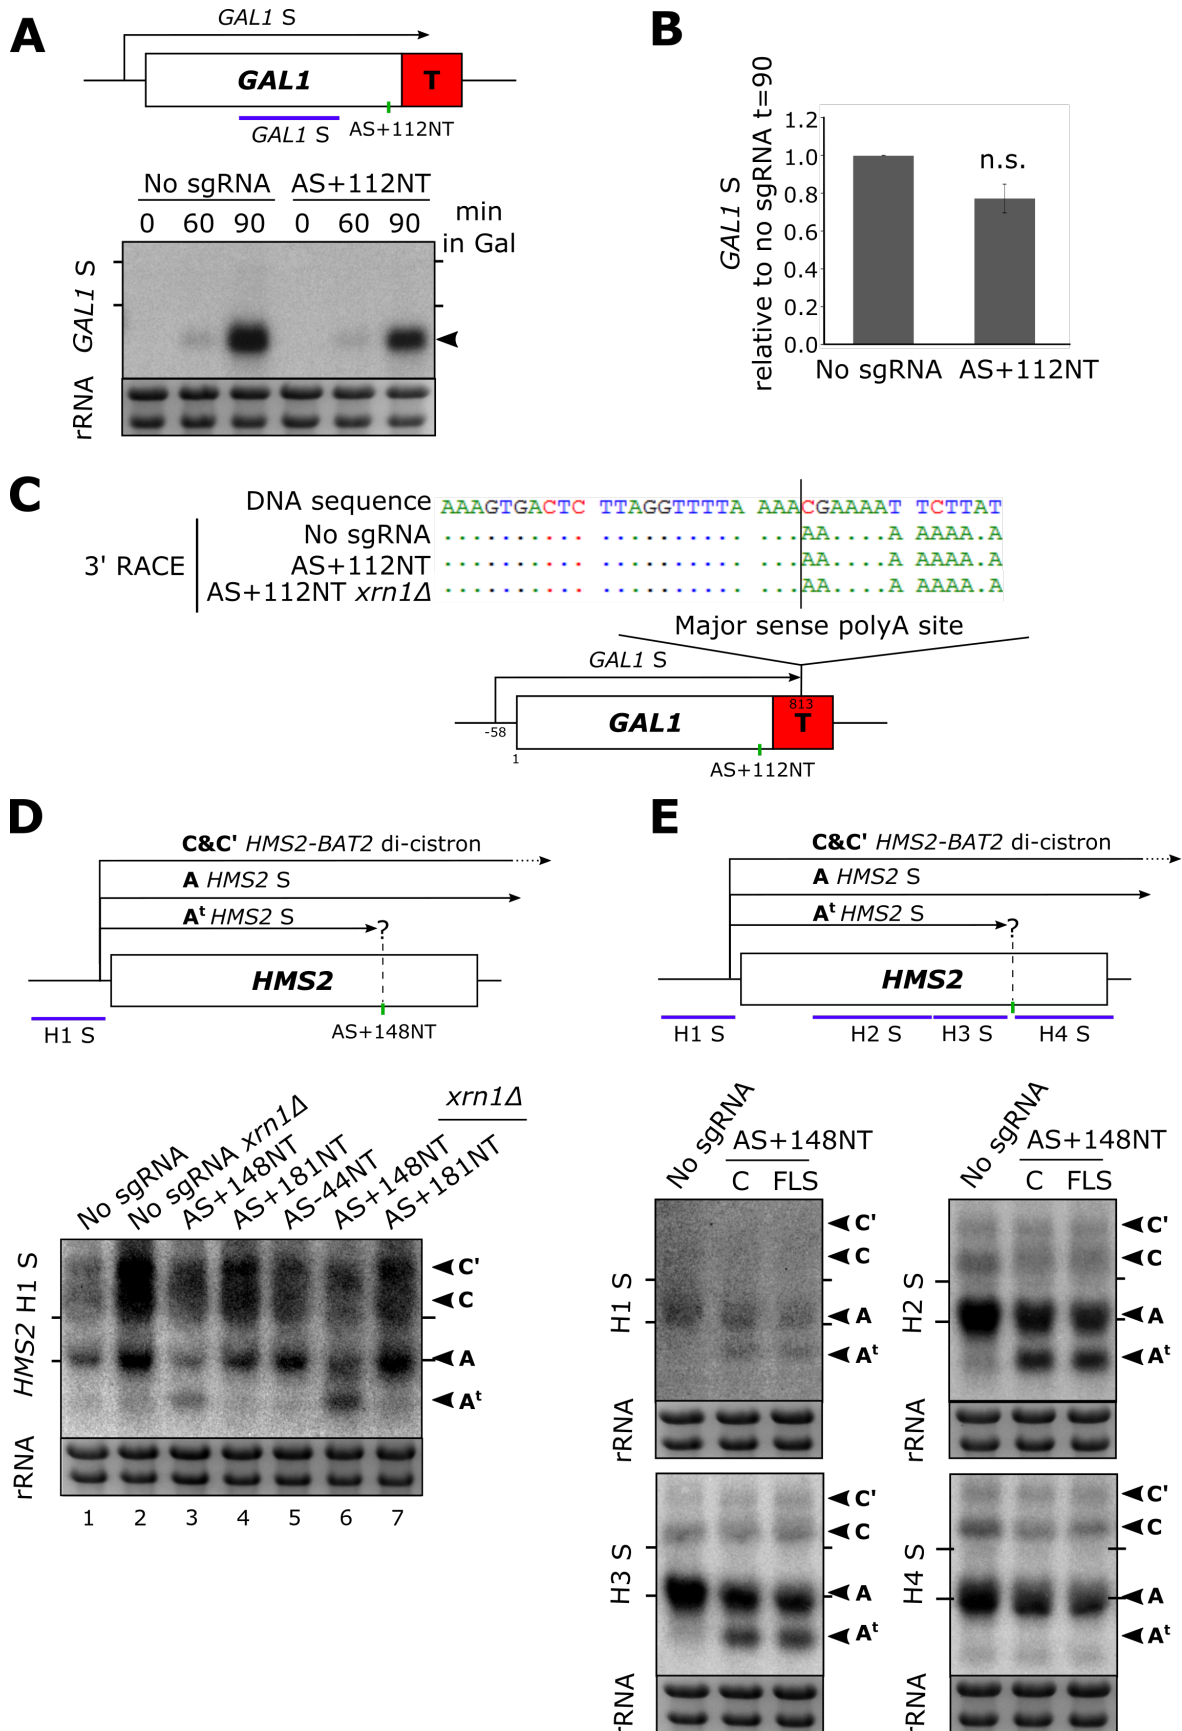

396

397 **A.** A Northern blot probed for the *GAL1* sense transcript (black arrow) in the control strain with no  
398 sgRNA (*GAL1 ADH1t snR52::URA3* with dCas9) and in the strain expressing sgRNA AS+112NT/dCas9.  
399 Samples were taken from cells grown in glucose (t=0) and at the indicated times after transfer to  
400 galactose-containing media (min). Ethidium bromide-stained rRNA is used as a loading control. **B.**  
401 Quantification of the Northern blot shown in (A) at t=90. N=4, error bars represent SEM, change is  
402 statistically non-significant (n.s.) p=0.062. **C.** A schematic showing the results of *GAL1* sense  
403 transcript 3' end mapping by RACE in the strains indicated. All distances are shown relative to the  
404 sense TSS. Transcript cleavage and polyadenylation occurs beyond the position of the *GAL1* AS-  
405 blocking AS+112NT sgRNA shown (green vertical line). **D.** A Northern blot probed with *HMS2* sense  
406 probe H1 (purple) showing the level of *HMS2* sense (black arrowhead, transcript A) in the no sgRNA  
407 control (*snR52::URA3* with dCas9) strain and strains expressing the indicated antisense-targeting  
408 sgRNAs. A truncated sense transcript (A<sup>t</sup>) was also detected in the strain expressing AS+148NT.  
409 Positions of the rRNA are indicated by the short horizontal lines. Ethidium bromide-stained rRNA is  
410 used as loading control. **E.** Northern blots with a series of *HMS2* sense-specific probes detecting the  
411 regions indicated in the schematic. The position of the sgRNA AS+148NT/dCas9 binding site is shown  
412 (green vertical line). Positions of the rRNA are indicated by the short horizontal lines. Ethidium  
413 bromide-stained rRNA is used as loading control.

414

415 **Figure 3 - Figure Supplement 1. *HMS2* sense-targeting sgRNAs/dCas9 do not affect *HMS2* sense or**  
 416 **antisense transcript levels.**

Figure S3:

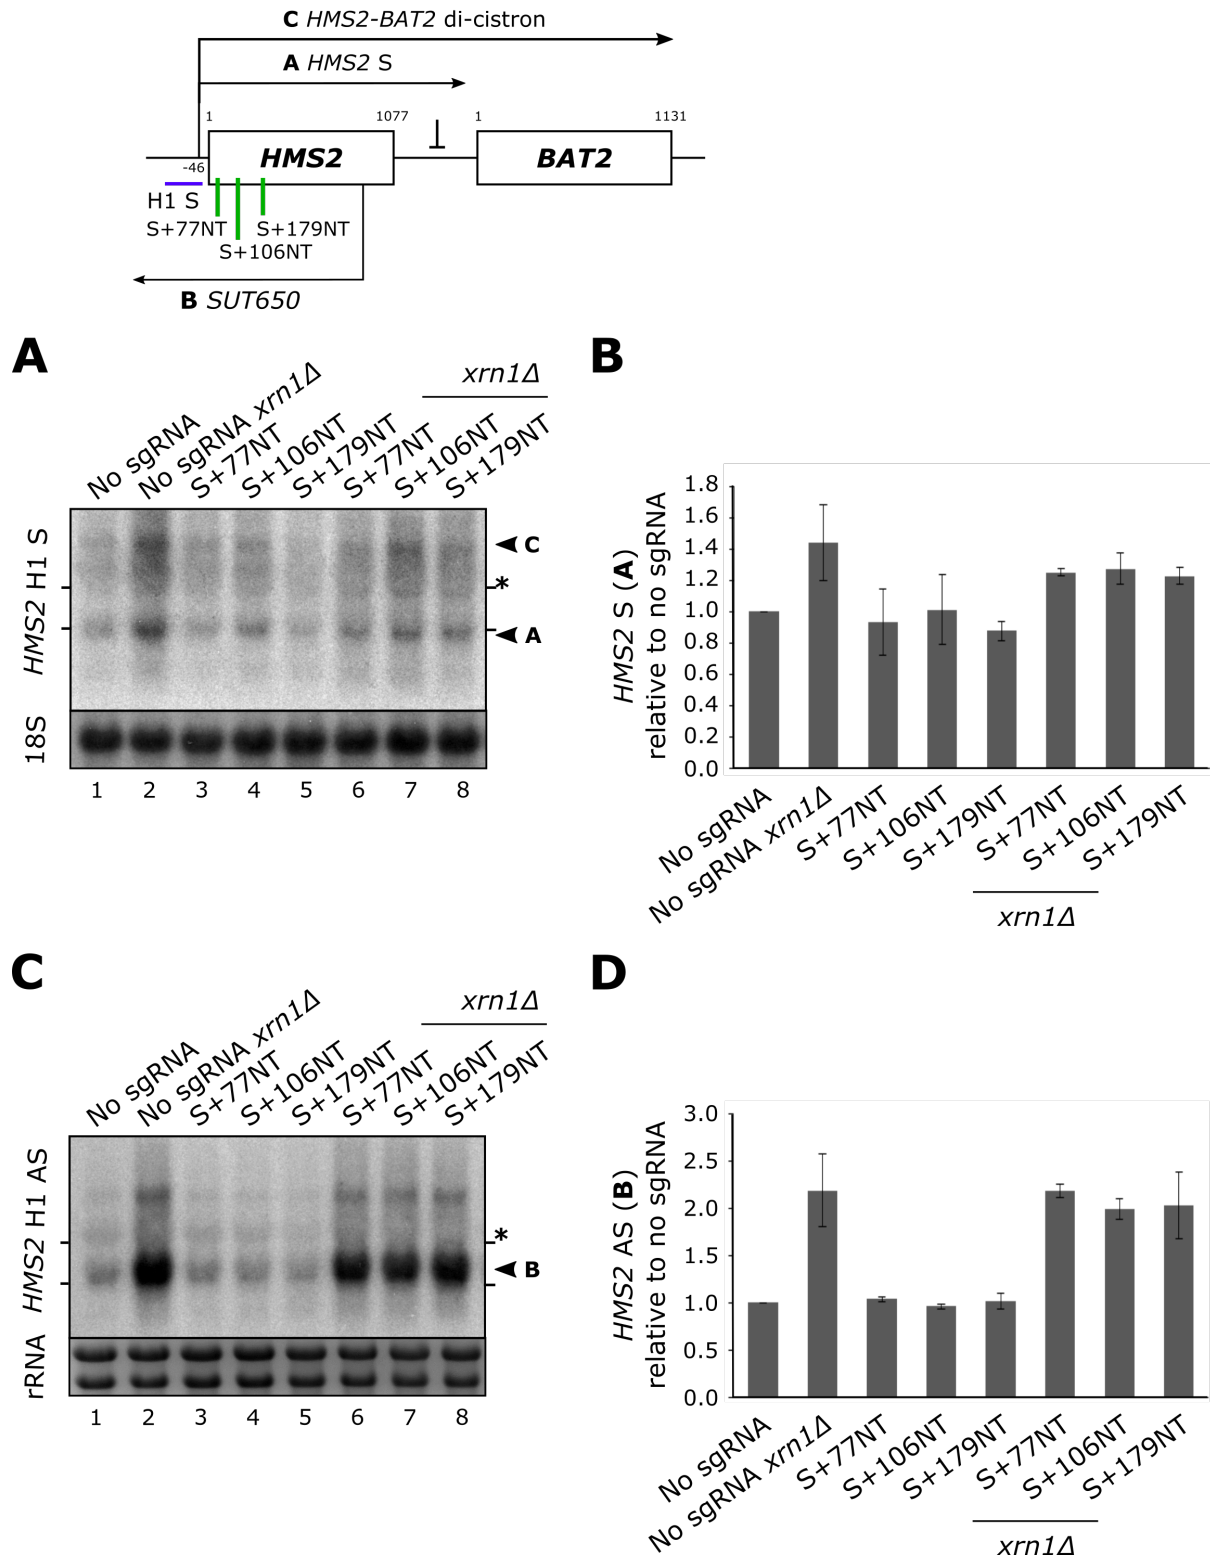

417

418 **A.** A Northern blot probed with *HMS2* sense probe H1 (purple) showing the level of *HMS2* sense  
 419 (black arrowhead, transcript A) in the no sgRNA control (*snR52::URA3* with dCas9) strain and strains

420 expressing the indicated sense-targeting sgRNAs. Positions of the rRNA are indicated by the short  
421 horizontal lines. The 18S rRNA is used as loading control. \*represents cross-hybridisation with the  
422 26S rRNA. **B.** Quantification of the Northern blot in (A). N=2, errors represent the SEM. **C.** A Northern  
423 blot as (A) but probed with *HMS2* antisense-specific probe H1. Ethidium bromide-stained rRNA is  
424 used as loading control. **D.** Quantification of the Northern blot in (C). N=2, errors represent the SEM.  
425

426 **Figure 4. CRISPRi block of *SUT650* and *GAL1 AS* is not as efficient as previous genetic interventions.**

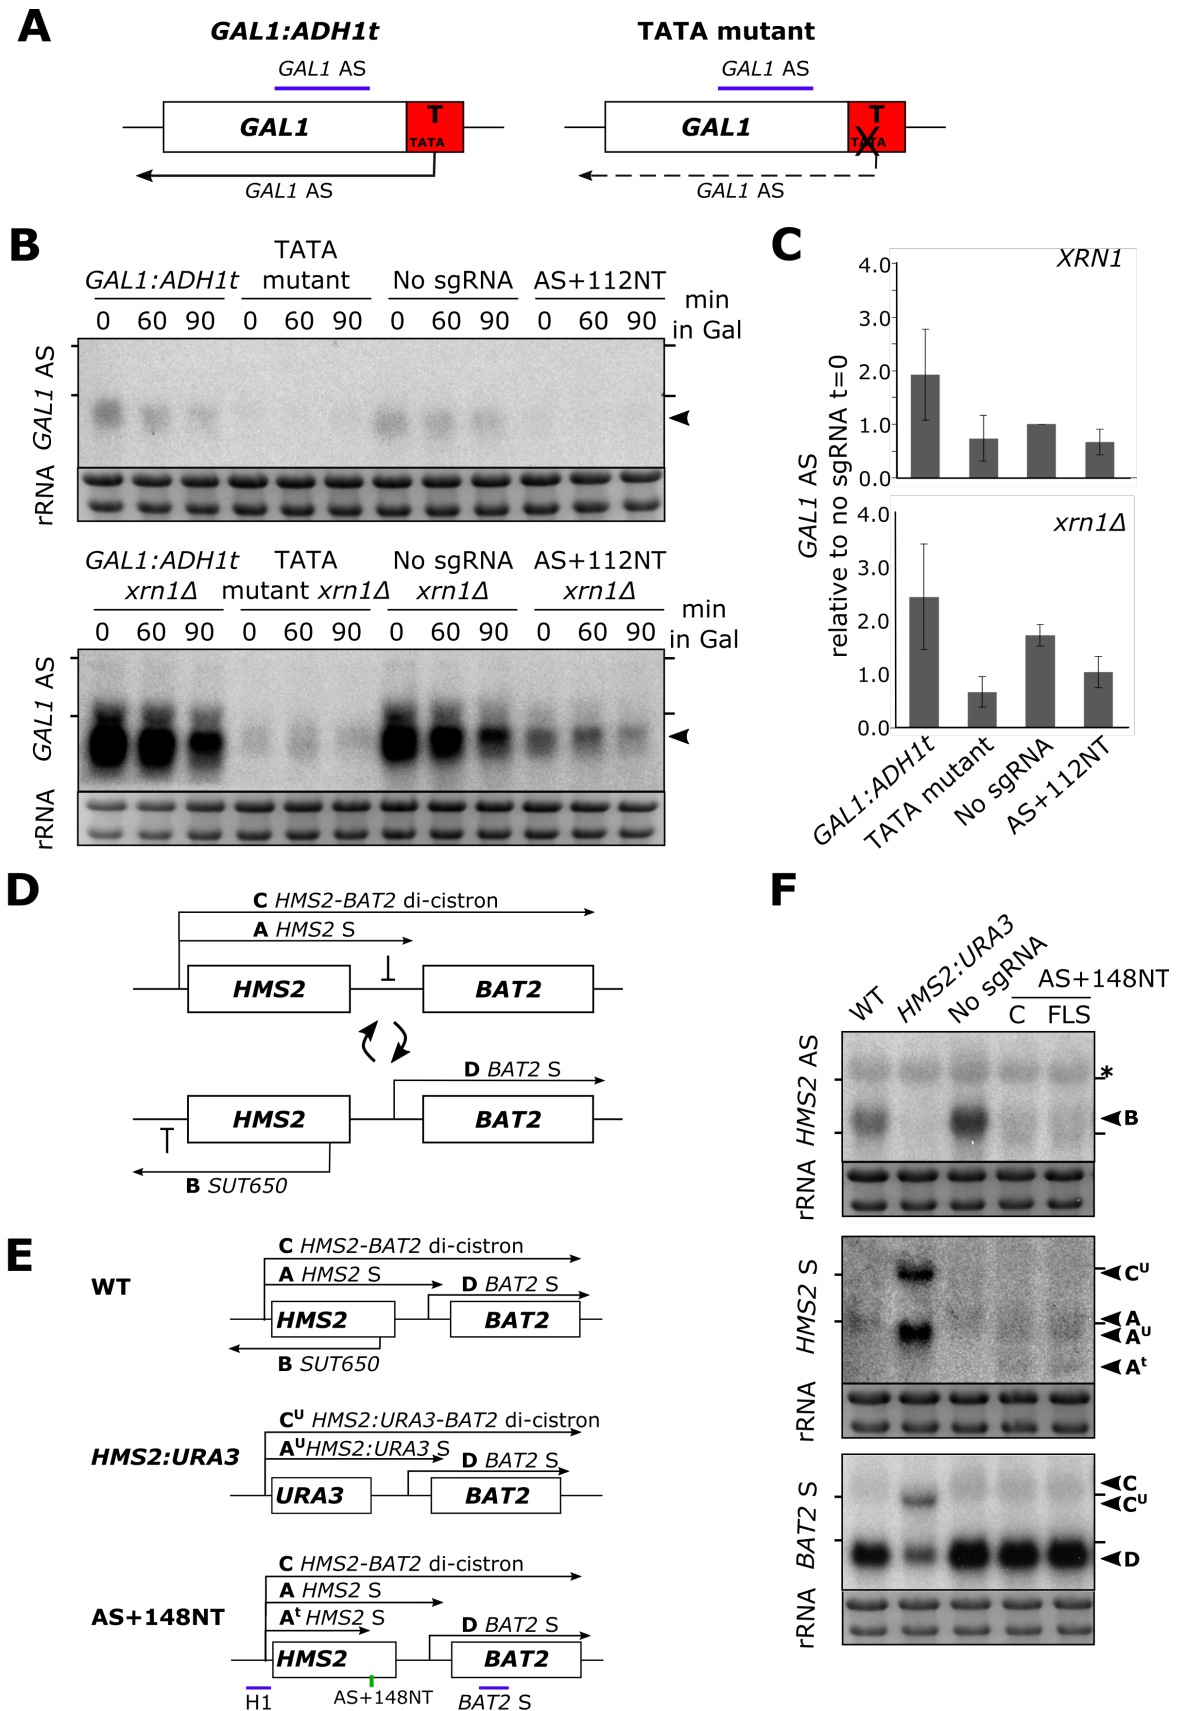

427

428 **A.** A schematic showing the previously used genetic intervention to repress the *GAL1* AS transcript  
429 (Murray et al., 2015). In the TATA mutant construct, a TATA box within the engineered *ADH1*  
430 terminator (T) is scrambled and the level of *GAL1* antisense transcript is reduced. **B.** A Northern blot  
431 probed for the *GAL1* antisense transcript (black arrowhead) comparing the two methods of reducing  
432 antisense at this locus in the presence (top blot) or absence (bottom blot) of *XRN1*. All samples were  
433 run on the same gel and the blots were exposed to film for the same time. Samples were taken from  
434 cells grown in glucose (t=0) and at the indicated times after transfer to galactose-containing media  
435 (min). Positions of the rRNA are indicated by the short horizontal lines. Ethidium bromide-stained  
436 rRNA is used as loading control. **C.** Quantification of the Northern blot in (B) at t=0. N=2, errors  
437 represent the SEM. **D.** A schematic of the *HMS2-BAT2* locus, showing the *HMS2* sense and antisense  
438 transcripts (A and B), the *HMS2-BAT2* di-cistronic transcripts (C and C') and the *BAT2* sense transcript  
439 (D). Cells switch between sense- and antisense-dominant states in which the indicated transcripts  
440 are produced (Nguyen et al., 2014). **E.** The *HMS2-BAT2* locus and associated transcripts in the WT  
441 strain and strains that repress the *SUT650* transcript. In the *HMS2:URA3* strain, the entire coding  
442 region of *HMS2* is replaced by that of *URA3*. **F.** Northern blots comparing the efficiency of *SUT650*  
443 reduction by replacement of the *HMS2* coding region with that of *URA3* versus CRISPRi and the  
444 relative effects of these two strategies on the *HMS2* sense and *BAT2* transcripts shown in (E). The  
445 WT (BY4741) and *HMS2.URA3* strains have been transformed with plasmid pRS315 to allow for  
446 growth on complete synthetic media lacking leucine and thus comparisons with the CRISPRi strains.  
447 Positions of the rRNA are indicated by the short horizontal lines. \*represents cross-hybridisation  
448 with the 26S rRNA. Ethidium bromide-stained rRNA is used as loading control.

449

450

451

452 **Supplementary File 1. Templates for sgRNAs**

453 **Supplementary File 2. Primers for strain construction**

454 **Supplementary File 3. *Saccharomyces cerevisiae* strains used in this study**

455 **Supplementary File 4. Primers for construction of Northern blot probe templates**

456 **Supplementary File 5. Primers for 3' RACE mapping of the *GAL1* sense transcript**

457

458 **Supplementary File 1. Templates for sgRNAs**

| <b>sgRNA template</b>                   | <b>Sequence 5'-3'</b>                                                                                                     |
|-----------------------------------------|---------------------------------------------------------------------------------------------------------------------------|
| Constant region                         | AGACATAAAAAACAAAAAAGCACCACCGACTCGGTGCCACTTTTTCAAGTTGATAACGG<br>ACTAGCCTTATTTAACTTGCTATTTCTAGCTC                           |
| <i>HMS2</i> S+77NT<br>variable region   | TAAAACGATGTCTTTGTAAGCAAAC                                                                                                 |
| <i>HMS2</i> S+106NT<br>variable region  | TAAAACGCTGCAGGGGAACGCTTACT                                                                                                |
| <i>HMS2</i> S+179NT<br>variable region  | TAAAACGACCAGTTCACCAAAGTCAT                                                                                                |
| <i>HMS2</i> AS+148NT<br>variable region | TAAAACCGGGATGCAACTGCGGGTGC                                                                                                |
| <i>HMS2</i> AS+181NT<br>variable region | TAAAACATCCAAAGAGCAGTTCATA                                                                                                 |
| <i>HMS2</i> AS-44NT<br>variable region  | TAAAACACTGCAAAAAATGGTGGAAA                                                                                                |
| <i>HMS2</i> S+77NT<br>full-length       | AGACATAAAAAACAAAAAAGCACCACCGACTCGGTGCCACTTTTTCAAGTTGATAACGG<br>ACTAGCCTTATTTAACTTGCTATTTCTAGCTCTAAAACGATGTCTTTGTAAGCAAAC  |
| <i>HMS2</i> S+106NT<br>full-length      | AGACATAAAAAACAAAAAAGCACCACCGACTCGGTGCCACTTTTTCAAGTTGATAACGG<br>ACTAGCCTTATTTAACTTGCTATTTCTAGCTCTAAAACGCTGCAGGGGAACGCTTACT |
| <i>HMS2</i> S+179NT<br>full-length      | AGACATAAAAAACAAAAAAGCACCACCGACTCGGTGCCACTTTTTCAAGTTGATAACGG<br>ACTAGCCTTATTTAACTTGCTATTTCTAGCTCTAAAACGACCAGTTCACCAAAGTCAT |
| <i>HMS2</i> AS+148NT<br>full-length     | AGACATAAAAAACAAAAAAGCACCACCGACTCGGTGCCACTTTTTCAAGTTGATAACGG<br>ACTAGCCTTATTTAACTTGCTATTTCTAGCTCTAAAACCGGGATGCAACTGCGGGTGC |
| <i>HMS2</i> AS+181NT<br>full-length     | AGACATAAAAAACAAAAAAGCACCACCGACTCGGTGCCACTTTTTCAAGTTGATAACGG<br>ACTAGCCTTATTTAACTTGCTATTTCTAGCTCTAAAACATCCAAAGAGCAGTTCATA  |
| <i>HMS2</i> AS-44NT<br>full-length      | AGACATAAAAAACAAAAAAGCACCACCGACTCGGTGCCACTTTTTCAAGTTGATAACGG<br>ACTAGCCTTATTTAACTTGCTATTTCTAGCTCTAAAACACTGCAAAAAATGGTGGAAA |
| <i>GAL1</i> AS+28NT<br>full-length      | CAAAATTTAAAGTGACTCTTGTTTTAGAGCTAGAAATAGCAAGTTAAAATAAGGCTAGTCC<br>GTTATCAACTTGAAAAAGTGGCACCGAGTCGGTGGTCTTTTTTTGTTTTTATGTCT |
| <i>GAL1</i> AS+112NT<br>full-length     | TGAGTTCAAACCGCAGTTGAGTTTTAGAGCTAGAAATAGCAAGTTAAAATAAGGCTAGTC<br>CGTTATCAACTTGAAAAAGTGGCACCGAGTCGGTGGTCTTTTTTTGTTTTTATGTCT |
| <i>GAL1</i> AS+93T<br>full-length       | TTTTCATGGTTTTTAATTGGTTTTAGAGCTAGAAATAGCAAGTTAAAATAAGGCTAGTCCG<br>TTATCAACTTGAAAAAGTGGCACCGAGTCGGTGGTCTTTTTTTGTTTTTATGTCT  |

459

460



461 **Supplementary File 2. Primers for strain construction**

| Primer                                                        | Sequence 5'-3'                                                     |
|---------------------------------------------------------------|--------------------------------------------------------------------|
| <i>URA3</i> insertion into <i>SNR52</i> F (template = pRS316) | GATGAATGACATTAGCGTGAACAATCTCTGATACAAA<br>TCCTGAGAGTGCACCACGCTTT    |
| <i>URA3</i> insertion into <i>SNR52</i> R (template = pRS316) | CAGAAGGAAGGCAACATAAGTTTTCTAATCCTAAAAT<br>CTGTGCGGTATTTACACCGCA     |
| sgRNA <i>HMS2</i> S+77NT insertion into <i>SNR52</i> F        | TCGGCGTTCGAAACTTCTCCGCAGTGAAAGATAAATGA<br>TCAGTTTGCTTACAAAGACATC   |
| sgRNA <i>HMS2</i> S+106NT insertion into <i>SNR52</i> F       | TCGGCGTTCGAAACTTCTCCGCAGTGAAAGATAAATGA<br>TCAGTAAGCGTTCCTGCAGC     |
| sgRNA <i>HMS2</i> S+179NT insertion into <i>SNR52</i> F       | TCGGCGTTCGAAACTTCTCCGCAGTGAAAGATAAATGA<br>TCATGACTTTGGTGAAGTGGTC   |
| sgRNA <i>HMS2</i> AS+148NT insertion into <i>SNR52</i> F      | TCGGCGTTCGAAACTTCTCCGCAGTGAAAGATAAATGA<br>TCGCACCCGAGTTGCATCCCG    |
| sgRNA <i>HMS2</i> AS+181NT insertion into <i>SNR52</i> F      | TCGGCGTTCGAAACTTCTCCGCAGTGAAAGATAAATGA<br>TCTATGAACTGCTCTTTGGATA   |
| sgRNA <i>HMS2</i> AS-44NT insertion into <i>SNR52</i> F       | TCGGCGTTCGAAACTTCTCCGCAGTGAAAGATAAATGA<br>TCTTCCACCATTTTTGCAGT     |
| sgRNA <i>GAL1</i> AS+28NT insertion into <i>SNR52</i> F       | TCGGCGTTCGAAACTTCTCCGCAGTGAAAGATAAATGA<br>TCCAAATTTT AAAGTGACTCTTG |
| sgRNA <i>GAL1</i> AS+112NT insertion into <i>SNR52</i> F      | TCGGCGTTCGAAACTTCTCCGCAGTGAAAGATAAATGA<br>TCTGAGTTCAAACCGCAGTTGA   |
| sgRNA <i>GAL1</i> AS+93T insertion into <i>SNR52</i> F        | TCGGCGTTCGAAACTTCTCCGCAGTGAAAGATAAATGA<br>TCTTTTCATG GTTTTTAATTGG  |
| sgRNA insertion into <i>SNR52</i> R                           | AGAGGTGGCATTTCACATAACAATAGTGACAAAAAATA<br>AAAGACATAAAAAACAAAAAA    |
| <i>SNR52</i> check F                                          | AGCAAACAGCCACTGACTGT                                               |
| <i>SNR52</i> check R                                          | GCGTACTAATGTTTTTGT                                                 |
| <i>SNR52</i> Sequencing F                                     | TTGTAGTGCCCTCTGGGCTAG                                              |

462

463

464 **Supplementary File 3. *Saccharomyces cerevisiae* strains used in this study**

| Strain name                    | Parent                          | Genotype                                                               | Source                |
|--------------------------------|---------------------------------|------------------------------------------------------------------------|-----------------------|
| BY4741                         | S288C                           | MATa; <i>his3Δ 1</i> ; <i>leu2Δ 0</i> ; <i>met15Δ 0</i> ; <i>ura3Δ</i> | Euroscarf             |
| snR52::URA3 + dCas9            | BY4741                          | snR52::URA3 + pTDH3-dCas9 (Addgene plasmid 46920, LEU)                 | This study            |
| HMS2 S+77NT                    | snR52::URA3 +dCas9              | snR52::sgRNA HMS2 S+77NT                                               | This study            |
| HMS2 S+106NT                   | snR52::URA3 +dCas9              | snR52::sgRNA HMS2 S+106NT                                              | This study            |
| HMS2 S+179NT                   | snR52::URA3 +dCas9              | snR52::sgRNA HMS2 S+179NT                                              | This study            |
| HMS2 AS+148NT                  | snR52::URA3 +dCas9              | snR52::sgRNA HMS2 AS+148NT                                             | This study            |
| HMS2 AS+181NT                  | snR52::URA3 +dCas9              | snR52::sgRNA HMS2 AS+181NT                                             | This study            |
| HMS2 AS-44NT                   | snR52::URA3 +dCas9              | snR52::sgRNA HMS2 AS-44NT                                              | This study            |
| HMS2 S+77NT <i>xrn1</i>        | HMS2 S+77NT                     | <i>xrn1</i> ::HISMX6                                                   | This study            |
| HMS2 S+106NT <i>xrn1</i>       | HMS2 S+106NT                    | <i>xrn1</i> ::HISMX6                                                   | This study            |
| HMS2 S+179NT <i>xrn1</i>       | HMS2 S+179NT                    | <i>xrn1</i> ::HISMX6                                                   | This study            |
| HMS2 AS+148NT <i>xrn1</i>      | HMS2 AS+148NT                   | <i>xrn1</i> ::HISMX6                                                   | This study            |
| HMS2 AS+181NT <i>xrn1</i>      | HMS2 AS+181NT                   | <i>xrn1</i> ::HISMX6                                                   | This study            |
| HMS2 AS-44NT <i>xrn1</i>       | HMS2 AS-44NT                    | <i>xrn1</i> ::HISMX6                                                   | This study            |
| BY4741 pRS315                  | BY4741                          | +pRS315 (LEU)                                                          | This study            |
| HMS2:URA3                      | BY4741                          | HMS2 Δ(1-1076)::URA3                                                   | (Nguyen et al., 2014) |
| HMS2:URA3 pRS315               | HMS2:URA3                       | +pRS315 (LEU)                                                          | This study            |
| GAL1::ADH1t                    | BY4741                          | GAL1 Δ(758-1587)::ADH1t                                                | (Murray et al., 2012) |
| TATA mutant                    | BY4741                          | GAL1 Δ(758-1587)::ADH1t (scramble TATA #1)                             | (Murray et al., 2015) |
| GAL1::ADH1t <i>xrn1</i>        | GAL1::ADH1t                     | <i>xrn1</i> ::KANMX6                                                   | This study            |
| TATA mutant <i>xrn1</i>        | TATA mutant                     | <i>xrn1</i> ::HISMX6                                                   | This study            |
| GAL1::ADH1t snR52::URA3 +dCas9 | GAL1::ADH1t                     | snR52::URA3 + pTDH3-dCas9 (Addgene plasmid 46920, LEU)                 | This study            |
| GAL1 AS+28NT                   | GAL1::ADH1t snR52::URA3         | snR52::sgRNA GAL1 AS+28NT                                              | This study            |
| GAL1 AS+112NT                  | GAL1::ADH1t snR52::URA3 + dCas9 | snR52::sgRNA GAL1 AS+112NT                                             | This study            |
| GAL1 AS+93T                    | GAL1::ADH1t snR52::URA3 +dCas9  | snR52::sgRNA GAL1 AS+93T                                               | This study            |
| GAL1 AS+112NT <i>xrn1</i>      | GAL1 AS+112NT                   | <i>xrn1</i> ::KANMX6                                                   | This study            |

465

466

467 **Supplementary File 4. Primers for construction of Northern blot probe templates**

| Primer                 | Sequence 5'-3'                            |
|------------------------|-------------------------------------------|
| <i>HMS2</i> H1 S F     | GACCCGTCCTCTTTTACCC                       |
| <i>HMS2</i> H1 S T7 R  | TAATACGACTCACTATAGGGGAGAGACACACTTGGCGACTG |
| <i>HMS2</i> H1 AS T7 F | TAATACGACTCACTATAGGGGACCCGTCCTCTTTTACCC   |
| <i>HMS2</i> H1 AS R    | AGAGACACACTTGGCGACTG                      |
| <i>HMS2</i> H2 S F     | GGCGGGCCCGCCGACTGCG                       |
| <i>HMS2</i> H2 S T7 R  | TAATACGACTCACTATAGGGGCGGTTTGGTAGGCGTGAAAC |
| <i>HMS2</i> H2 AS T7 F | TAATACGACTCACTATAGGGGGCGGGCCCGCCCGACTGCG  |
| <i>HMS2</i> H2 AS R    | CGGGTGCCACTGAGTGGCCG                      |
| <i>HMS2</i> H3 S F     | GTTTCA CGCCTACCAA ACCG                    |
| <i>HMS2</i> H3 S T7 R  | TAATACGACTCACTATAGGGGCGGGTGCCACTGAGTGGCCG |
| <i>HMS2</i> H4 S F     | TACGACCTC TTTTCGTCAC                      |
| <i>HMS2</i> H4 S T7 R  | TAATACGACTCACTATAGGGGCGGGTGCCACTGAGTGGCCG |
| <i>HMS2</i> H4 AS T7 F | TAATACGACTCACTATAGGGTACGACCTC TTTTCGTCAC  |
| <i>HMS2</i> H4 AS R    | GAATGACCCTCAGAGGCAGG                      |
| <i>BAT2</i> S F        | AGGCTTACAGAACGGTGGAC                      |
| <i>BAT2</i> S T7 R     | TAATACGACTCACTATAGGGGCTCTATCAGGCGTGAAAC   |
| <i>GAL1</i> F          | TGTGTCGGACTGGTCTAATT                      |
| <i>GAL1</i> R          | GATCCATACCGCCATTGTTA                      |
| 18S F                  | AGTGAAACTGCGAATGGCTC                      |
| 18S R                  | TGCTGGCACCAGACTTGCCC                      |

468

469

470

471 **Supplementary File 5. Primers for 3' RACE mapping of the *GAL1* sense transcript**

| <b>Primer</b>                        | <b>Sequence 5'-3'</b>                |
|--------------------------------------|--------------------------------------|
| Adapter Primer (AP)                  | GCCCACGCGTCGACTAGTACTTTTTTTTTTTTTTTT |
| Universal amplification primer (UAP) | GCCCACGCGTCGACTAGTAC                 |
| <i>GAL1</i> +346 F                   | TTGATCCTTCTGTGTCGGACTG               |

472
